# Supplementary material for: Cause-specific mortality following sustained virologic response in hepatitis C patients treated with direct-acting antivirals: a standardized mortality ratio analysis
Source: Sci Rep. 2025 Nov 27;15:45560. doi: 10.1038/s41598-025-29972-6 (PMC12749750; doi:10.1038/s41598-025-29972-6)
Supplement: Supplementary file 2 — Supplementary Information 2. [file 41598_2025_29972_MOESM2_ESM.xlsx]

## Sheet: Sheet1
	general population(per thousand)			All death						Malignancy death						hepatic malignancy death						cardiovascular death						LDR death						non-LDR death						extrahepatic malignancy death
Age	All	Male	Female	All (n)	Mortality	Male (n)	Mortality	Female (n)	Mortality	All (n)	Mortality	Male (n)	Mortality	Female (n)	Mortality	All (n)	Mortality	Male (n)	Mortality	Female (n)	Mortality	All (n)	Mortality	Male (n)	Mortality	Female (n)	Mortality	All (n)	Mortality	Male (n)	Mortality	Female (n)	Mortality	All (n)	Mortality	Male (n)	Mortality	Female (n)	Mortality	All (n)	Mortality	Male (n)	Mortality	Female (n)	Mortality
20～24	6236	3212	3024	2165	0.000347178	1363	0.000424346	802	0.000265212	167	2.678e-05	94	2.92653e-05	73	2.41402e-05	2	3.20718e-07	1	3.11333e-07	1	3.30688e-07	117	1.8762e-05	78	2.42839e-05	39	1.28968e-05	7	1.12251e-06	4	1.24533e-06	3	9.92063e-07	2158	0.000346055	1359	0.000423101	799	0.00026422	165	2.64593e-05	93	2.89539e-05	72	2.38095e-05
25～29	6479	3333	3146	2344	0.000361784	1560	0.000468047	784	0.000249205	223	3.44189e-05	127	3.81038e-05	96	3.05149e-05	7	1.08041e-06	7	2.10021e-06		0	193	2.97885e-05	143	4.29043e-05	50	1.58932e-05	27	4.16731e-06	21	6.30063e-06	6	1.90718e-06	2317	0.000357617	1539	0.000461746	778	0.000247298	216	3.33385e-05	120	3.60036e-05	96	3.05149e-05
30～34	6380	3273	3106	2828	0.00044326	1866	0.000570119	962	0.000309723	437	6.84953e-05	184	5.62175e-05	253	8.14552e-05	9	1.41066e-06	7	2.13871e-06	2	6.43915e-07	350	5.48589e-05	253	7.72991e-05	97	3.12299e-05	59	9.24765e-06	43	1.31378e-05	16	5.15132e-06	2769	0.000434013	1823	0.000556981	946	0.000304572	428	6.70846e-05	177	5.40788e-05	251	8.08113e-05
35～39	7047	3593	3454	4428	0.000628352	2882	0.000802115	1546	0.000447597	951	0.000134951	379	0.000105483	572	0.000165605	15	2.12857e-06	4	1.11328e-06	11	3.18471e-06	761	0.000107989	569	0.000158363	192	5.55877e-05	178	2.5259e-05	113	3.145e-05	65	1.88188e-05	4250	0.000603094	2769	0.000770665	1481	0.000428778	936	0.000132822	375	0.00010437	561	0.00016242
40～44	7765	3938	3827	7048	0.000907663	4438	0.00112697	2610	0.000681996	1900	0.000244688	756	0.000191976	1144	0.000298929	47	6.0528e-06	31	7.87202e-06	16	4.18082e-06	1413	0.00018197	1036	0.000263078	377	9.85106e-05	428	5.51191e-05	306	7.77044e-05	122	3.18788e-05	6620	0.000852543	4132	0.00104926	2488	0.000650118	1853	0.000238635	725	0.000184104	1128	0.000294748
45～49	9115	4620	4495	13150	0.00144268	8371	0.0018119	4779	0.00106318	3949	0.000433242	1641	0.000355195	2308	0.000513459	114	1.25069e-05	89	1.92641e-05	25	5.56174e-06	3141	0.000344597	2378	0.000514719	763	0.000169744	918	0.000100713	704	0.000152381	214	4.76085e-05	12232	0.00134196	7667	0.00165952	4565	0.00101557	3835	0.000420735	1552	0.000335931	2283	0.000507898
50～54	9650	4868	4782	22443	0.0023257	14365	0.0029509	8078	0.00168925	7743	0.000802383	3558	0.000730896	4185	0.000875157	283	2.93264e-05	223	4.58094e-05	60	1.25471e-05	5577	0.000577927	4272	0.000877568	1305	0.000272898	1574	0.000163109	1218	0.000250205	356	7.44458e-05	20869	0.00216259	13147	0.0027007	7722	0.00161481	7460	0.000773057	3335	0.000685086	4125	0.00086261
55～59	8279	4143	4136	29337	0.00354354	19682	0.00475066	9655	0.00233438	11102	0.00134098	5847	0.0014113	5255	0.00127055	489	5.90651e-05	398	9.60657e-05	91	2.20019e-05	7136	0.00086194	5600	0.00135168	1536	0.000371373	1939	0.000234207	1580	0.000381366	359	8.67988e-05	27398	0.00330934	18102	0.0043693	9296	0.00224758	10613	0.00128192	5449	0.00131523	5164	0.00124855
60～64	7507	3719	3788	41967	0.00559038	28963	0.00778785	13004	0.00343295	17356	0.00231198	10427	0.00280371	6929	0.0018292	969	0.00012908	799	0.000214843	170	4.48786e-05	9770	0.00130145	7539	0.00202716	2231	0.000588965	2725	0.000362995	2228	0.000599086	497	0.000131204	39242	0.00522739	26735	0.00718876	12507	0.00330174	16387	0.0021829	9628	0.00258887	6759	0.00178432
65～69	7332	3569	3763	65937	0.00899304	46086	0.0129129	19851	0.00527531	28303	0.0038602	18304	0.00512861	9999	0.00265719	1657	0.000225996	1321	0.000370132	336	8.92905e-05	14435	0.00196877	10781	0.00302073	3654	0.000971034	3537	0.000482406	2793	0.000782572	744	0.000197715	62400	0.00851064	43293	0.0121303	19107	0.0050776	26646	0.00363421	16983	0.00475848	9663	0.0025679
70～74	8817	4161	4656	133733	0.0151676	91540	0.0219995	42193	0.00906207	55119	0.00625145	36349	0.00873564	18770	0.00403136	3293	0.000373483	2489	0.000598174	804	0.00017268	28936	0.00328184	20341	0.00488849	8595	0.00184601	6047	0.000685834	4428	0.00106417	1619	0.000347723	127686	0.0144818	87112	0.0209354	40574	0.00871435	51826	0.00587796	33860	0.00813747	17966	0.00385868
75～79	7474	3365	4108	178252	0.0238496	115354	0.0342805	62898	0.0153111	64289	0.00860169	41807	0.0124241	22482	0.00547274	3781	0.000505887	2735	0.000812779	1046	0.000254625	39802	0.00532539	25088	0.00745557	14714	0.00358179	6303	0.000843324	4349	0.00129242	1954	0.000475657	171949	0.0230063	111005	0.0329881	60944	0.0148354	60508	0.0080958	39072	0.0116113	21436	0.00521811
80～84	5895	2458	3437	248066	0.0420807	145769	0.0593039	102297	0.0297635	69732	0.011829	42509	0.0172941	27223	0.00792057	4475	0.000759118	2975	0.00121033	1500	0.000436427	58079	0.00985225	32367	0.013168	25712	0.00748094	7193	0.00122019	4420	0.00179821	2773	0.000806808	240873	0.0408606	141349	0.0575057	99524	0.0289566	65257	0.0110699	39534	0.0160838	25723	0.00748414
85～89	3979	1448	2531	320874	0.0806419	159670	0.110269	161204	0.0636918	65613	0.0164898	35919	0.0248059	29694	0.0117321	4460	0.00112088	2601	0.00179627	1859	0.000734492	80169	0.020148	37006	0.0255566	43163	0.0170537	7038	0.00176879	3788	0.00261602	3250	0.00128408	313836	0.0788731	155882	0.107653	157954	0.0624077	61153	0.0153689	33318	0.0230097	27835	0.0109976
90～94	2045	583	1463	300934	0.147156	113161	0.194101	187773	0.128348	40819	0.0199604	18544	0.0318079	22275	0.0152256	2543	0.00124352	1275	0.00218696	1268	0.000866712	78011	0.0381472	26471	0.0454048	51540	0.035229	3963	0.0019379	1783	0.00305832	2180	0.00149009	296971	0.145218	111378	0.191043	185593	0.126858	38276	0.0187169	17269	0.0296209	21007	0.0143589
